# Supplementary material for: Removal of multifold heavy metal contaminations in drinking water by porous magnetic Fe2O3@AlO(OH) superstructure
Source: Royal Society of Chemistry journal article supplement (doi:10.1039/c2ta00594h), 2012-11-06
Supplement: c2ta00594h.pdf [file c2ta00594h.pdf]

## ***Supporting Information:***

### **Removal of Multifold Heavy Metal Contaminations in Drinking Water by Porous Magnetic Fe<sub>2</sub>O<sub>3</sub>@AlOOH Superstructure**

Xiulin Yang,<sup>ab</sup> Xueyun Wang,<sup>ab</sup> Yongqiang Feng,<sup>ab</sup> Guoqiang Zhang,<sup>ab</sup> Taishan Wang,<sup>a</sup> Weiguo Song,<sup>a</sup> Chunying Shu,<sup>a</sup> Li Jiang<sup>a\*</sup> and Chunru Wang<sup>a\*</sup>

<sup>a</sup>Beijing National Laboratory for Molecular Sciences; Key Lab of Molecular Nanostructure and Nanotechnology, Institute of Chemistry, Chinese Academy of Sciences, Beijing, 100190, China; <sup>b</sup>Graduate School of Chinese Academy of Sciences, Beijing, 100039, China

### **Experimental Section**

**Materials:** All chemical reagents used in this experiment were of analytical grade. Pb(NO<sub>3</sub>)<sub>2</sub>, Na<sub>2</sub>HAsO<sub>4</sub>·7H<sub>2</sub>O, K<sub>2</sub>Cr<sub>2</sub>O<sub>7</sub>, FeSO<sub>4</sub>·7H<sub>2</sub>O, Mg(CH<sub>3</sub>COO)<sub>2</sub>·4H<sub>2</sub>O, Na<sub>2</sub>CO<sub>3</sub>, Al(NO<sub>3</sub>)<sub>3</sub>·9H<sub>2</sub>O, HCl, NaOH, ethanol and ethylene glycol were procured commercially and were used as received without further purification.

**Synthesis of urchin-like hierarchical Fe<sub>2</sub>O<sub>3</sub>@AlO(OH):** The urchin-like hierarchical  $\gamma$ -FeOOH was fabricated using one-pot solvothermal method. Specifically, 0.5561 g of FeSO<sub>4</sub>·7H<sub>2</sub>O and 0.4289 g of Mg(CH<sub>3</sub>COO)<sub>2</sub>·4H<sub>2</sub>O were dissolved in Milli-Q water (100 mL) under vigorous stirring for 30 min at room temperature. And then, the solution was heated to 90 °C with continuously stirred for additional 1 h in round bottom flask (250 mL). After that, the mixture was filtered through a PTFE membrane (pore size: 0.22  $\mu$ m), and washed with double-distilled water and ethanol several times. The obtained products were dried in a vacuum oven at 70 °C for 12 h. In order to prepare porous magnetic  $\alpha$ ,  $\gamma$ -Fe<sub>2</sub>O<sub>3</sub>, the vacuum-dried powders were calcined at 350 °C for 4 h using a ramp rate of 5 °C · min<sup>-1</sup> in the flow of nitrogen (purity:  $\geq$  99.99%).

The  $\gamma$ -AlO(OH)-coated  $\alpha$ ,  $\gamma$ -Fe<sub>2</sub>O<sub>3</sub> were prepared by *in situ* chemical precipitation method in accordance with the following procedure. The obtained  $\alpha$ ,  $\gamma$ -Fe<sub>2</sub>O<sub>3</sub> (100 mg) and Al(NO<sub>3</sub>)<sub>3</sub>·9H<sub>2</sub>O (360.7 mg) were dispersed in 120 mL ethylene glycol-H<sub>2</sub>O (v/v = 1:5) through an ultrasonic treatment process for 30 min. Subsequently, 244.6 mg Na<sub>2</sub>CO<sub>3</sub> dissolved in 20 mL deionized water was added to the fully dispersed solution with ultrasonic vibrations for another 30 min. The mixture was then vigorously stirred for 5 h at room temperature. Final products were collected by a PTFE membrane, washing with deionized water and ethanol for several times to remove any possible ionic remnants, followed by drying overnight in a vacuum oven at 70 °C. The  $\gamma$ -AlO(OH) was also prepared according to the same procedure but without  $\alpha$ ,  $\gamma$ -Fe<sub>2</sub>O<sub>3</sub> added. All chemical reagents used in this study were analytical grade and were used without further purification.

***Synthesis of FeOOH using K<sub>2</sub>CO<sub>3</sub> as alkaline source:*** 0.5561 g of FeSO<sub>4</sub>·7H<sub>2</sub>O and 0.2120 g of Na<sub>2</sub>CO<sub>3</sub> were dissolved in Milli-Q water (100 mL) under vigorous stirring for 30 min at room temperature. And then, the solution was heated to 90 °C with continuously stirred for additional 1 h in round bottom flask (250 mL). After that, the mixture was filtered through a PTFE membrane (pore size: 0.22  $\mu$ m), and washed with double-distilled water and ethanol several times. The obtained products were dried in a vacuum oven at 70 °C for 12 h.

***Toxic heavy metal ions removal:*** The solution containing different concentrations of Pb(II), As(V) and Cr(VI) with 10, 20, 50, 100 and 200 mg·L<sup>-1</sup> were prepared using Pb(NO<sub>3</sub>)<sub>2</sub>, Na<sub>2</sub>HAsO<sub>4</sub>·7H<sub>2</sub>O and K<sub>2</sub>Cr<sub>2</sub>O<sub>7</sub> as the sources of heavy metal ions, respectively. The pH value of the Na<sub>2</sub>HAsO<sub>4</sub> and K<sub>2</sub>Cr<sub>2</sub>O<sub>7</sub> solutions was adjusted to 4 with hydrochloric acid (0.2 M) prior to the adsorption experiments to ensure species of As(V) and Cr (VI) as negative

charged anions. The time-dependant curves were performed with the initial ion concentration for  $10 \text{ mg}\cdot\text{L}^{-1}$  and sample dose for  $20 \text{ mg}/100 \text{ mL}$ . At predetermined time intervals,  $5 \text{ mL}$  supernatant solutions were pipetted and filtered through  $0.22 \mu\text{m}$  PTFE membranes. For the adsorption isotherms,  $5 \text{ mg}$  of the urchin-like  $\text{Fe}_2\text{O}_3@\text{AlO}(\text{OH})$  was added to  $25 \text{ mL}$  of the above solution under stirring at room temperature. After  $12 \text{ h}$ , the samples were separated through  $0.22 \mu\text{m}$  PTFE membrane and analyzed by inductively coupled plasma-optical emission spectroscopy (Shimazu ICPE-9000) to measure the concentration of metal ions in the remaining solution. The adsorption capacity of the adsorbents was calculated according to the following equation (1):<sup>1</sup>

$$q_e = \frac{(C_0 - C_e)V}{m} \quad (1)$$

where  $C_0$  and  $C_e$  represent the initial and equilibrium concentrations ( $\text{mg}\cdot\text{L}^{-1}$ ), respectively.  $V$  is the volume of the solution ( $\text{mL}$ ), and  $m$  is the amount of adsorbent ( $\text{mg}$ ).

**Characterization:** The morphology and microstructures of the samples were characterized by field emission scanning electron microscopy (FE-SEM, JEOL 6701F), transmission electron microscopy (TEM, JEOL 2010). X-ray diffraction (XRD) patterns were performed on a Rigaku D/max-2500 diffractometer with  $\text{Cu K}\alpha$  radiation ( $\lambda = 1.5418 \text{ \AA}$ ) at  $40 \text{ kV}$  and  $30 \text{ mA}$ . XPS data were obtained with an ESCALab220i-XL electron spectrometer from VG Scientific using  $300\text{W Al K}\alpha$  radiation. Fourier transform infrared spectrometry (FT-IR, Thermo Fisher Scientific) was employed to analyze the surface chemical composition. Thermal gravity measurement was made on a TGA/STA409 PC module with a rising temperature rate of  $10 \text{ }^\circ\text{C min}^{-1}$  from  $50$  to  $1000 \text{ }^\circ\text{C}$  under continuous  $\text{N}_2$  flow.  $^{27}\text{Al}$  solid-state NMR spectra were recorded at  $104.2 \text{ MHz}$  with a pulse width of  $0.33 \mu\text{s}$  on a Bruker Avance 400 solid-state

spectrometer by using an aluminum sulfate liquid solution as a reference. The specific surface areas of the as-prepared products were measured on a Quantachrome Autosorb AS-1 instrument, and the pore size distributions were derived from the desorption branches of the isotherm with the Barrett-Joyner-Halenda (BJH) model. The magnetic properties of the magnetic nanocomposites were investigated using a vibrating sample magnetometer with an applied field of between -10000 and 10000 Oe at room temperature. pH value was measured using pH meter (Thermo Scientific, Model: 410p-13).

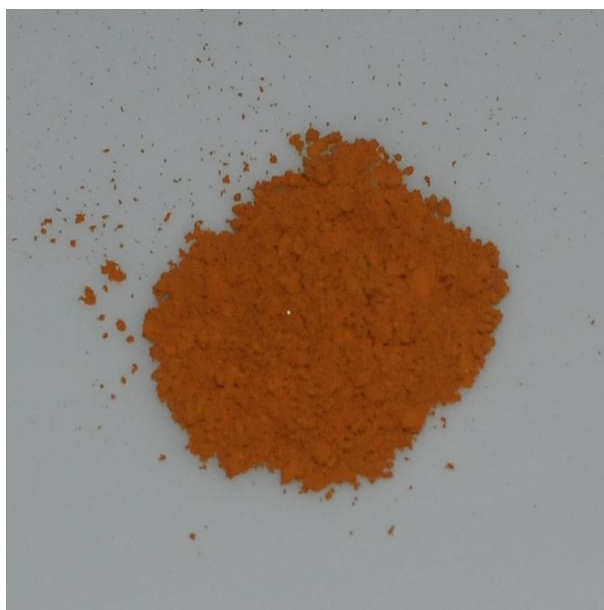

**$\gamma$ -FeOOH**

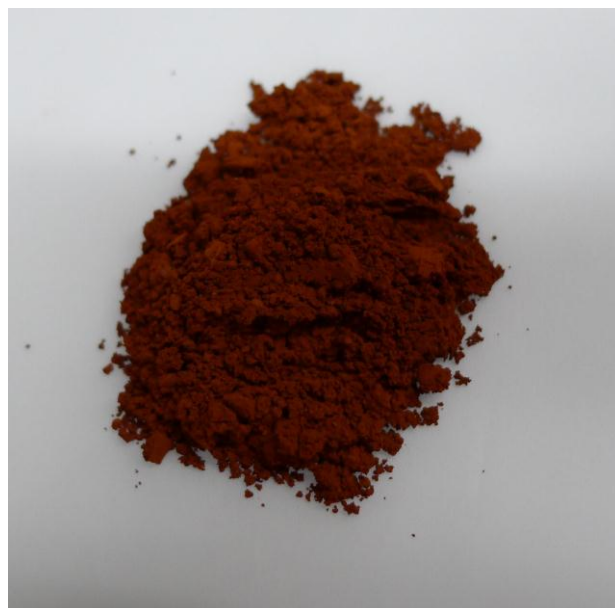

$\alpha, \gamma\text{-Fe}_2\text{O}_3$

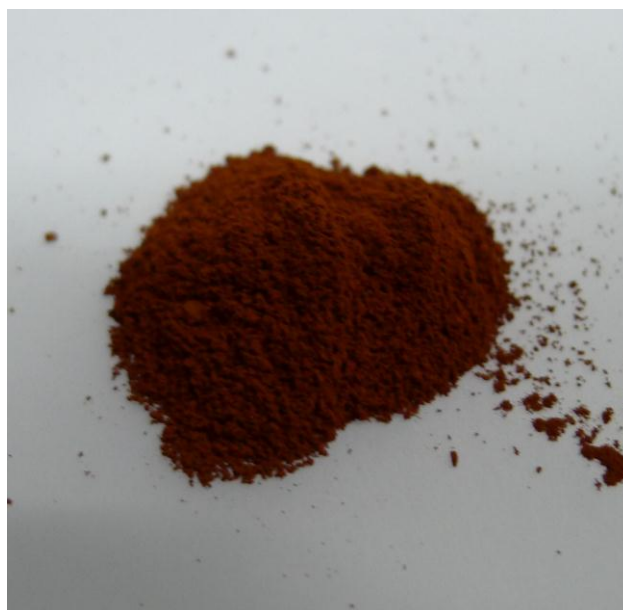

$\text{Fe}_2\text{O}_3\text{@AlO(OH)}$

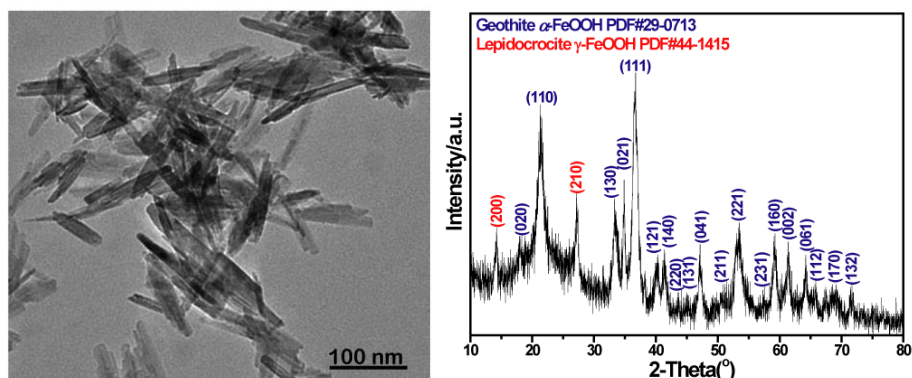

**Fig. S1** TEM image (left) and XRD result (right) of FeOOH prepared by Na<sub>2</sub>CO<sub>3</sub> as alkaline source.

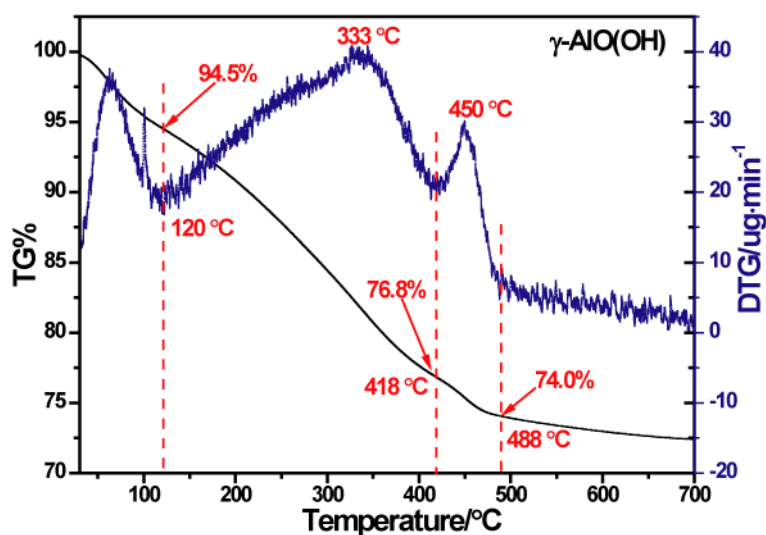

**Fig. S2** TG and DTG curves of γ-AlO(OH).

Fig. S2 shows the TG-DTG profiles of the synthesized γ-AlO(OH). The weight loss between 30 and 120 °C in the TG curve, accompanied with an endothermic peak around 120 °C, could be attributed to the loss of surface adsorbed water.<sup>2</sup> The weight loss between 120 and 418 °C on the TG curve, accompanied with a strong exothermic peak around 333 °C, is mainly due to the γ-AlO(OH) tardily decomposed to γ-Al<sub>2</sub>O<sub>3</sub>. The mass loss of the γ-AlO(OH) at 120-418 °C of ca. 17.7 % is due to the removal of structural water and the surface -OH groups from γ-AlO(OH), which is higher than that of the theoretical value of

15% on going from  $\gamma$ -AlO(OH) to  $\gamma$ -Al<sub>2</sub>O<sub>3</sub>.<sup>3</sup> A sharp exothermic peak appears on the DTG curve of around 450 °C may be caused by the decomposition of carbonate ions adsorbed on the surface of  $\gamma$ -AlO(OH), whose existence has been confirmed by XPS and FT-IR spectroscopy.

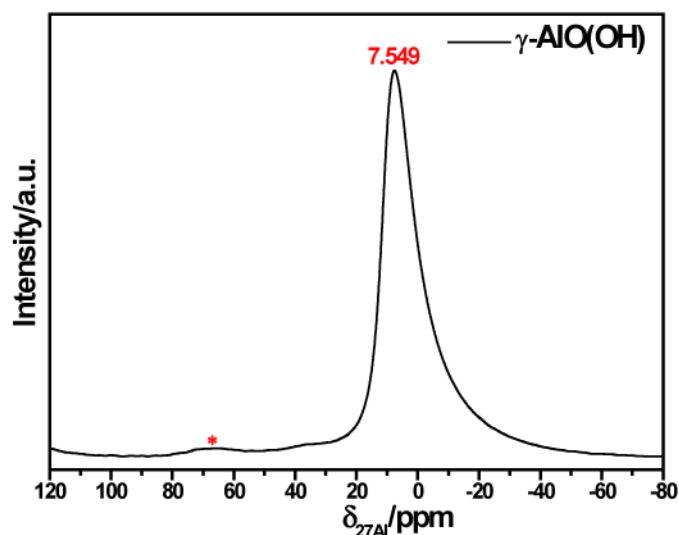

**Fig. S3** <sup>27</sup>Al MAS NMR spectra of prepared  $\gamma$ -AlO(OH).

Solid-state <sup>27</sup>Al MAS NMR spectra of the pure AlO(OH) s shown in Fig. S3, which has been used extensively to study the properties of glasses, zeolites, ceramics and cements, etc.<sup>4</sup> Under certain conditions, solid-state NMR spectra can yield valuable information about chemical bonding and molecular structure that may be unavailable from solution NMR spectroscopy. The spectrum from the sample shows a single peak at 7.549 ppm, corresponding to boehmite  $\gamma$ -AlO(OH), which has been widely reported possessing a signal with chemical shift in the range 4~9 ppm.<sup>5</sup> Meanwhile, It has been clearly confirmed that boehmite  $\gamma$ -AlO(OH) contains only octahedrally coordinated aluminium.<sup>6</sup>

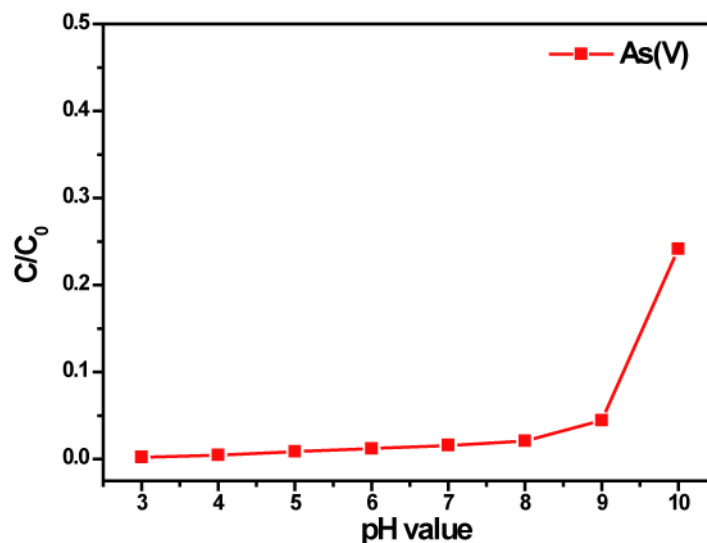

**Fig. S4.** Adsorption efficiencies of As(V) by Fe<sub>2</sub>O<sub>3</sub>@AlO(OH) as a function of pH. Experiments were conducted at pH 3~10, with 5 mg samples stirring for 12 h. Initial arsenic concentration: 5 mg·L<sup>-1</sup>, sample volume: 25 mL.

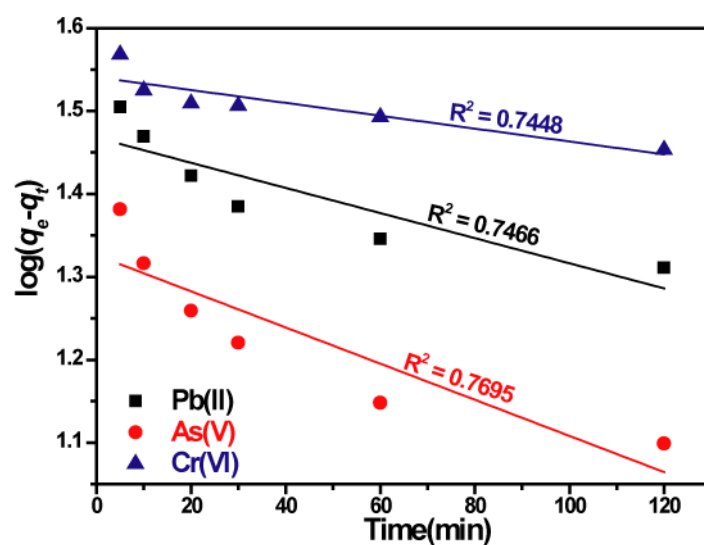

**Fig. S5** Adsorption kinetics based on the pseudo-first-order kinetic model on the adsorption of Pb(II), As(V) and Cr(VI) ions onto the Fe<sub>2</sub>O<sub>3</sub>@AlO(OH), the initial ion concentration is 10 mg·L<sup>-1</sup> and sample dose is 20 mg/100 mL.



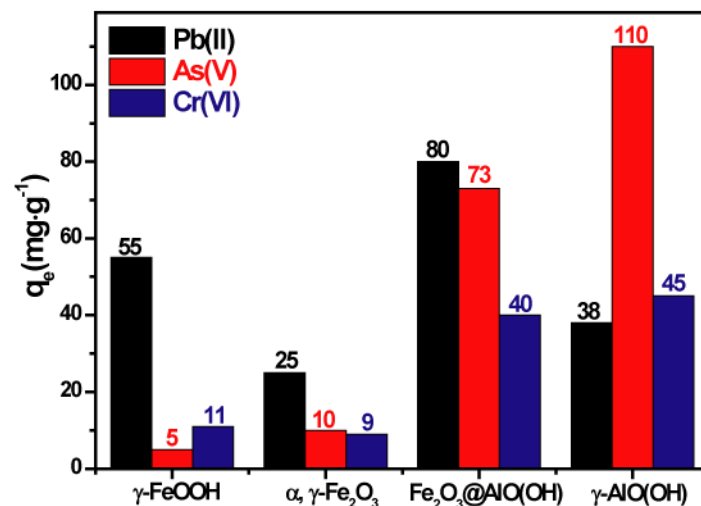

**Fig. S6** Different samples as sorbents for Pb(II), As(V) and Cr(VI) ions removal.

**Table S1** Summary of As(V), Cr(VI) and Pb(II) maximum adsorption capacities (q<sub>m</sub>) on various adsorbents.

| Sorbents                                                                         | As(V): q <sub>m</sub><br>(mg.g <sup>-1</sup> ) | Cr(VI): q <sub>m</sub><br>(mg.g <sup>-1</sup> ) | Pb(II): q <sub>m</sub><br>(mg.g <sup>-1</sup> ) | BET<br>(m <sup>2</sup> .g <sup>-1</sup> ) |
|----------------------------------------------------------------------------------|------------------------------------------------|-------------------------------------------------|-------------------------------------------------|-------------------------------------------|
| Fe <sub>2</sub> O <sub>3</sub> @Al(OH)CO <sub>3</sub> (this study)               | 75.3                                           | 41.3                                            | 89.2                                            | 320.8                                     |
| Urchin-like α-FeOOH hollow spheres <sup>7</sup>                                  | 58                                             | --                                              | 80                                              | 96.9                                      |
| Chrysanthemum-like α-FeOOH <sup>8</sup>                                          | 66.2                                           | --                                              | 103                                             | 120.8                                     |
| Ceria Hollow Nanospheres <sup>9</sup>                                            | 22.4                                           | 15.4                                            | 9.2                                             | 72                                        |
| 3D Flowerlike Fe <sub>2</sub> O <sub>3</sub> Nanostructures <sup>10</sup>        | 7.6                                            | 5.4                                             | --                                              | 40                                        |
| Flowerlike α-Fe <sub>2</sub> O <sub>3</sub> <sup>11</sup>                        | 51                                             | 30                                              | --                                              | 130                                       |
| Mesoporous Zr-Ti Oxide <sup>12</sup>                                             | --                                             | 29.46                                           | --                                              | 413                                       |
| Mesoporous Titania Beads <sup>13</sup>                                           | --                                             | 11.5                                            | --                                              | 144                                       |
| Fe@Fe <sub>2</sub> O <sub>3</sub> Core-Shell Nanowires <sup>14</sup>             | --                                             | 7.78                                            | --                                              | 31.1                                      |
| hierarchical SiO <sub>2</sub> @γ-AlOOH spheres                                   | --                                             | ~4.5                                            | --                                              | 139.5                                     |
| γ-AlOOH(Boehmite)@SiO <sub>2</sub> /Fe <sub>3</sub> O <sub>4</sub> <sup>15</sup> | --                                             | --                                              | 214.59                                          | 28.6                                      |

## Reference

- 1 X.-Y. Yu, R.-X. Xu, C. Gao, T. Luo, Y. Jia, J.-H. Liu and X.-J. Huang, *ACS Appl. Mat. Interfaces*, **2012**, *4*, 1954; V. Rocher, J.-M. Siaugue, V. Cabuil and A. Bee, *Water Res.*, **2008**, *42*, 1290.
- 2 Y. Zhu, H. Hou, G. Tang and Q. Hu, *Eur. J. Inorg. Chem.*, **2010**, *2010*, 872.
- 3 L. Zhang, X. Jiao, D. Chen and M. Jiao, *Eur. J. Inorg. Chem.*, **2011**, *2011*, 5258.
- 4 J. Ashenurst, G. Wu and S. Wang, *J. Am. Chem. Soc.*, **2000**, *122*, 2541.
- 5 L. A. O'Dell, S. L. P. Savin, A. V. Chadwick and M. E. Smith, *Solid State Nucl. Magn. Reson.*, **2007**, *31*, 169.
- 6 E. W. Hagaman, J. Jiao, B. Chen, Z. Ma, H. Yin and S. Dai, *Solid State Nucl. Magn. Reson.*, **2010**, *37*, 82.
- 7 B. Wang, H. Wu, L. Yu, R. Xu, T. T. Lim and X. W. Lou, *Adv. Mater.*, **2012**, *24*, 1111.
- 8 H. Li, W. Li, Y. Zhang, T. Wang, B. Wang, W. Xu, L. Jiang, W. Song, C. Shu and C. Wang, *J. Mater. Chem.*, **2011**.
- 9 C.-Y. Cao, Z.-M. Cui, C.-Q. Chen, W.-G. Song and W. Cai, *J. Phys. Chem. C*, **2010**, *114*, 9865.
- 10 L. S. Zhong, J. S. Hu, H. P. Liang, A. M. Cao, W. G. Song and L. J. Wan, *Adv. Mater.*, **2006**, *18*, 2426.
- 11 C.-Y. Cao, J. Qu, W.-S. Yan, J.-F. Zhu, Z.-Y. Wu and W.-G. Song, *Langmuir*, **2012**, *28*, 4573.
- 12 D. Chen, L. Cao, T. L. Hanley and R. A. Caruso, *Adv. Funct. Mater.*, **2012**, *22*, 1966.
- 13 N. Wu, H. Wei and L. Zhang, *Environ. Sci. Technol.*, **2011**, *46*, 419.
- 14 Z. Ai, Y. Cheng, L. Zhang and J. Qiu, *Environ. Sci. Technol.*, **2008**, *42*, 6955.
- 15 Y.-X. Zhang, X.-Y. Yu, Z. Jin, Y. Jia, W.-H. Xu, T. Luo, B.-J. Zhu, J.-H. Liu and X.-J. Huang, *J. Mater. Chem.*, **2011**, *21*, 16550.
